# Supplementary material
Source: publisher figshare collection journal article supplement (https://asha.figshare.com/articles/dataset/_/22111181)
Supplement: Supplementary file 1 [file 1]

**Supplemental Material S1.** CSCEDARS Tool (Schlosser et al., 2018) adaptations for the current review.

| <b>CSCEDARS</b> |                                                                                                                                                                               |
|-----------------|-------------------------------------------------------------------------------------------------------------------------------------------------------------------------------|
| <b>Item</b>     | <b>Reporting Required to Meet Criteria for the Current Review</b>                                                                                                             |
| 1               | Information required to meet criteria: (a) age, (b) gender, (c) diagnoses, (d) pre-intervention communication skills                                                          |
| 5               | To meet criteria, measurement of inter-observer agreement was based on at least 20% of sessions <i>in each AAC condition</i> .                                                |
| 6               | Implementors must be specified.                                                                                                                                               |
| 7               | To meet criteria, measurement of treatment integrity was based on at least 20% of sessions <i>in each AAC condition</i> .                                                     |
| 8               | Baseline sessions were measured separately for each AAC condition, rather than all AAC conditions available in the same baseline sessions.                                    |
| 10              | The target behavior did not need to be the same (e.g., use the AAC device v. exchange a picture), but the variable did (e.g., the metric and function of the behavior).       |
| 11              | Interobserver agreement needed to be reported for <i>each</i> condition, <i>or</i> the range of agreement needed to be less than 10%.                                         |
| 12              | Treatment integrity needed to be reported for <i>each</i> condition, <i>or</i> the range of integrity needed to be less than 10%.                                             |
| 16              | All studies met criteria for this item, given that conditions are highly discriminable due to the presence of different AAC systems.                                          |
| 19              | If the researchers conducted a formal preference assessment (e.g., MSWO) to identify the child's preferred materials for requesting, this was considered an objective method. |
| 20              | The same stimuli could not be used in both instructional conditions.                                                                                                          |
| 21              | The same stimuli could not be used in both instructional conditions.                                                                                                          |

**Reference**

Schlosser, R. W., Belfiore, P. J., Sigafoos, J., Briesch, A. M., & Wendt, O. (2018). Appraisal of comparative single case experimental designs for instructional interventions with nonreversible target behaviors: Introducing the CSCEDARS (“Cedars”). *Research in Developmental Disabilities*, 79, 33–52.  
<https://doi.org/10.1016/j.ridd.2018.04.028>
