# Supplementary material
Source: publisher figshare collection journal article supplement (https://asha.figshare.com/articles/dataset/_/22111181)
Supplement: Supplementary file 2 [file 1]

**Supplemental Material S4.** Reasons for exclusion from analysis.

| <b>Study</b> | <b>Participant</b> | <b>Excluded From</b>           | <b>Reason for Exclusion</b>                                                                          |
|--------------|--------------------|--------------------------------|------------------------------------------------------------------------------------------------------|
| Achmadi 2014 | George             | Meta-analysis                  | No graphing of raw data for the intervention phase                                                   |
| Achmadi 2014 | Harvey             | Meta-analysis                  | No graphing of raw data for the intervention phase                                                   |
| Achmadi 2014 | Kane               | Meta-analysis                  | No graphing of raw data for the intervention phase                                                   |
| Achmadi 2014 | Theo               | Meta-analysis                  | No graphing of raw data for the intervention phase                                                   |
| Bloh 2020    | Mark               | Visual analysis                | <3 data points per condition in the intervention phase                                               |
| Couper 2014  | Andy               | Visual analysis, meta-analysis | Did not complete the study because his parents withdrew him                                          |
| Couper 2014  | Jimmy              | Visual analysis, meta-analysis | Demonstrated proficiency with one or more compared conditions during baseline                        |
| Couper 2014  | Nico               | Visual analysis, meta-analysis | Demonstrated proficiency with one or more compared conditions during baseline                        |
| Couper 2014  | Shane              | Visual analysis, meta-analysis | Demonstrated proficiency with one or more compared conditions during baseline                        |
| Hill 2014    | Art                | Visual analysis, meta-analysis | Received instruction in the AAC systems prior to the data graphed in the official intervention phase |
| Hill 2014    | Olive              | Visual analysis, meta-analysis | Received instruction in the AAC systems prior to the data graphed in the official intervention phase |
| Hill 2014    | Sandra             | Visual analysis, meta-analysis | Received instruction in the AAC systems prior to the data graphed in the official intervention phase |

|              |               |                                |                                                                                                              |
|--------------|---------------|--------------------------------|--------------------------------------------------------------------------------------------------------------|
| Simms 2015   | Jack          | Visual analysis, meta-analysis | Demonstrated proficiency with one or more compared conditions during baseline                                |
| Tönsing 2016 | Participant 3 | Meta-analysis                  | Communicative function of outcomes (2-symbol statements) was different from all other studies in the review. |
| Tönsing 2016 | Participant 4 | Meta-analysis                  | Communicative function of outcomes (2-symbol statements) was different from all other studies in the review. |

## References

- Achmadi, D., Sigafoos, J., van der Meer, L., Sutherland, D., Lancioni, G. E., O'Reilly, M. F., Hodis, F., Green, V. A., McLay, L., & Marschik, P. B. (2014). Acquisition, preference, and follow-up data on the use of three AAC options by four boys with developmental disability/delay. *Journal of Developmental and Physical Disabilities*, 26(5), 565–583. <https://doi.org/10.1007/s10882-014-9379-z>
- Bloh, C., Johnson, N., Strohl, C., & Tidmarsh, N. (2020). Increasing communication for students with visual impairments and developmental disabilities. *The Analysis of Verbal Behavior*, 36(1), 157–168. <https://doi.org/10.1007/s40616-019-00121-1>
- Couper, L., van der Meer, L., Schäfer, M. C. M., McKenzie, E., McLay, L., O'Reilly, M. F., Lancioni, G. E., Marschik, P. B., Sigafoos, J., & Sutherland, D. (2014). Comparing acquisition of and preference for manual signs, picture exchange, and speech-generating devices in nine children with autism spectrum disorder. *Developmental Neurorehabilitation*, 17(2), 99–109. <https://doi.org/10.3109/17518423.2013.870244>
- Hill, D. A., & Flores, M. M. (2014). Comparing the Picture Exchange Communication System and the iPad™ for communication of students with autism spectrum disorder and developmental delay. *TechTrends*, 58(3), 45–53. <https://doi.org/10.1007/s11528-014-0751-8>
- Simms, C. B. (2015). *An evaluation of mand modalities for individuals with limited verbal repertoires* [Unpublished doctoral dissertation]. University of Florida.
- Tönsing, K. M. (2016). Supporting the production of graphic symbol combinations by children with limited speech: A comparison of two AAC systems. *Journal of Developmental and Physical Disabilities*, 28(1), 5–29. <https://doi.org/10.1007/s10882-015-9425-5>
